# Supplementary material
Source: publisher site journal article supplement (https://www.dovepress.com/article/218635)

**Supplementary material**

**Table S1** Next-generation sequencing panel

**Figure S1** OS by PD‑L1 expression ≥90%.X-axis is in years. The analyses are censored at 5 years. OS, overall survival; PD-L1, programmed cell death ligand-1.

**Figure S2** PFS by PD‑L1 expression ≥90%.X-axis is in years. The analyses are censored at 5 years. PD-L1, programmed cell death ligand-1; PFS, progression-free survival.

**Figure S3** OS from initiation of second-line therapy by PD‑L1 expression ≥90%.X-axis is in years. The analyses are censored at 5 years. OS, overall survival; PD-L1, programmed cell death ligand-1.

**Figure S4** OS from initiation of third-line therapy by PD‑L1 expression ≥90%.X-axis is in years. The analyses are censored at 5 years. OS, overall survival; PD-L1, programmed cell death ligand-1.

**Figure S5** OS by PD‑L1 expression and *EGFR* mutation status.X-axis is in years. The analyses are censored at 5 years. *EGFR*, epidermal growth factor receptor; OS, overall survival; PD-L1, programmed cell death ligand-1.

**Figure S6** PFS by PD‑L1 expression and *EGFR* mutation status. X-axis is in years. The analyses are censored at 5 years. *EGFR*, epidermal growth factor receptor; PD-L1, programmed cell death ligand-1; PFS, progression-free survival.

**Figure S7** OS by PD‑L1 expression and *KRAS* mutation status. X-axis is in years. The analyses are censored at 5 years. *KRAS*, Kirsten rat sarcoma viral oncogene; OS, overall survival; PD-L1, programmed cell death ligand-1.

**Figure S8** PFS by PD‑L1 expression and *KRAS* mutation status.X-axis is in years. The analyses are censored at 5 years. *KRAS*, Kirsten rat sarcoma viral oncogene; PD-L1, programmed cell death ligand-1; PFS, progression-free survival.

| **Table S1 Next-generation sequencing panel** | | | | | | | |  |  |
| --- | --- | --- | --- | --- | --- | --- | --- | --- | --- |
|  |  |  |  |  |  |  |  |  |  |
| ABCA6 | AJUBA | ARID1A | BAX | BRCA2 | CBR3 | CDC6 | CES2 | CROCC | CYP2C8 |
| ABCB1 | AKAP7 | ARID2 | BCL10 | BRD2 | CBWD6 | CDC7 | CFTR | CRTC1 | CYP2C9 |
| ABCB5 | AKAP9 | ARID5B | BCL11A | BRD3 | CCDC144NL | CDC73 | CHD3 | CSF1R | CYP2D6 |
| ABCC1 | AKR1C2 | ARNT | BCL11B | BRIP1 | CCKBR | CDCP2 | CHEK1 | CSF2RA | CYP2E1 |
| ABCC2 | AKT1 | ART5 | BCL2 | BTG1 | CCNA2 | CDH1 | CHEK2 | CSMD3 | CYP2F1 |
| ABCC3 | AKT2 | ASPM | BCL2L1 | BTG2 | CCNB1 | CDH11 | CHST3 | CTCF | CYP2J2 |
| ABCC4 | AKT3 | ASXL1 | BCL2L11 | BTK | CCND1 | CDH2 | CIC | CTLA4 | CYP2R1 |
| ABCC6 | ALDH1A1 | ATF1 | BCL2L2 | BUB1B | CCND2 | CDH20 | CIITA | CTNNA1 | CYP2S1 |
| ABCF1 | ALDH2 | ATIC | BCL3 | C10orf11 | CCND3 | CDH5 | CKS1B | CTNNB1 | CYP2W1 |
| ABCG2 | ALDH3A1 | ATM | BCL6 | C10orf140 | CCNE1 | CDK12 | CLASP1 | CUL3 | CYP3A4 |
| ABL1 | ALG13 | ATP7A | BCL6B | C11orf30 | CCR4 | CDK2 | CLDN16 | CUZD1 | CYP3A43 |
| ABL2 | ALK | ATR | BCL9 | C19orf16 | CCR5 | CDK2AP1 | CLIP1 | CYB5R4 | CYP3A5 |
| ACTR3B | ALPK2 | ATRX | BCOR | C19orf55 | CD22 | CDK4 | CLOCK | CYBA | CYP3A7 |
| ACVR1B | AMER1 | AURKA | BCORL1 | C20orf80 | CD33 | CDK6 | CMPK1 | CYLD | CYP4A11 |
| ACVR2A | ANK2 | AURKB | BCR | C21orf58 | CD3G | CDK8 | CNDP1 | CYP17A1 | CYP4A22 |
| ADAM29 | ANKRD11 | AURKC | BEND5 | C22orf31 | CD44 | CDKN1A | COBLL1 | CYP19A1 | CYP4B1 |
| ADAMTS10 | ANKRD30A | AUTS2 | BIRC2 | C8orf45 | CD52 | CDKN1B | COL1A1 | CYP1A1 | CYP4F2 |
| ADAMTS20 | ANKRD36 | AXIN2 | BIRC3 | C9orf150 | CD58 | CDKN2A | COL5A3 | CYP1A2 | DACH1 |
| ADH1A | ANO10 | AXL | BIRC5 | CARD11 | CD70 | CDKN2B | COMT | CYP1B1 | DAXX |
| ADNP | APC | B2M | BLM | CASC5 | CD79A | CDKN2C | CRBN | CYP21A2 | DCC |
| ADORA2A | AR | B4GALT3 | BLNK | CASP5 | CD79B | CEACAM5 | CREB1 | CYP26A1 | DCP1B |
| AFF1 | ARAF | BAG1 | BMPR1A | CAT | CD80 | CEBPA | CREBBP | CYP2A13 | DDB2 |
| AFF3 | ARFRP1 | BAI3 | BMPR2 | CBFB | CDA | CENPF | CRIPAK | CYP2A6 | DDHD1 |
| AGAP10 | ARHGAP35 | BAP1 | BRAF | CBL | CDC27 | CENPH | CRKL | CYP2B6 | DDIT3 |
| AHNAK | ARHGAP5 | BARD1 | BRCA1 | CBR1 | CDC42EP1 | CEP164 | CRLF2 | CYP2C19 | DDR1 |
| DDR2 | EML4 | ERG | FANCE | FKBP1A | FZR1 | GRM8 | HNRNPL | IL2RA | KCNJ5 |
| DDX11 | EP300 | ESD | FANCF | FKBP9 | G6PD | GSK3B | HNRPL | IL6ST | KDM5A |
| DDX23 | EP400 | ESR1 | FANCG | FLCN | GATA1 | GSTA1 | HOOK3 | IL7R | KDM5C |
| DEFB126 | EPCAM | ESR2 | FANCL | FLI1 | GATA2 | GSTM1 | HRAS | ING4 | KDM6A |
| DEK | EPHA1 | ESRP1 | FAS | FLJ42177 | GATA3 | GSTM3 | HSP90AA1 | INHBA | KDR |
| DHFR | EPHA2 | ESRRA | FBXW7 | FLT1 | GCNT2 | GSTM5 | HSP90AB1 | INSR | KEAP1 |
| DHX8 | EPHA3 | ETS1 | FCAMR | FLT3 | GDNF | GSTP1 | HSPA8 | IRF4 | KIAA0355 |
| DICER1 | EPHA4 | ETV1 | FCER2 | FLT4 | GGH | GUCY1A2 | ICK | IRS2 | KIAA1009 |
| DIEXF | EPHA5 | ETV4 | FCGBP | FMN2 | GGT1 | H3F3A | ID3 | IRS4 | KIAA1024 |
| DLEC1 | EPHA6 | ETV5 | FCGR3A | FN1 | GID4 | H3F3C | IDH1 | ISX | KIAA1211 |
| DNMT3A | EPHA7 | ETV6 | FCRLA | FOLR1 | GLTSCR1 | HAVCR1 | IDH2 | ITGA10 | KIF25 |
| DOT1L | EPHB1 | EWSR1 | FEN1 | FOPNL | GNA11 | HCAR1 | IFI27 | ITGA9 | KIF6 |
| DPYD | EPHB4 | EXT1 | FGF10 | FOS | GNA13 | HCK | IFITM3 | ITGB2 | KIT |
| DST | EPHB6 | EXT2 | FGF14 | FOXA1 | GNAQ | HDAC9 | IFNAR1 | ITGB3 | KITLG |
| DTX1 | EPHX1 | EYS | FGF19 | FOXA2 | GNAS | HERPUD1 | IFT81 | ITK | KLC3 |
| DUSP6 | EPPK1 | EZH2 | FGF23 | FOXL2 | GNLY | HGF | IGF1R | ITPA | KLF4 |
| EBF1 | ERBB2 | F2RL2 | FGF3 | FOXM1 | GNRH1 | HIF1A | IGF2 | JAK1 | KLF6 |
| EBPL | ERBB3 | FAM174B | FGF4 | FOXO1 | GNRHR | HIST1H1C | IGF2R | JAK2 | KLHL6 |
| EEF1B2 | ERBB4 | FAM186A | FGF6 | FOXO3 | GNRHR2 | HIST1H1E | IGSF3 | JAK3 | KPNA2 |
| EGF | ERCC1 | FAM18A | FGFR1 | FOXP1 | GOLGA6L6 | HIST1H2BD | IKBKB | JPH4 | KRAS |
| EGFR | ERCC2 | FAM46C | FGFR2 | FOXP4 | GOT1L1 | HIST1H3B | IKBKE | JUN | KRT15 |
| EGR3 | ERCC3 | FAM71E2 | FGFR3 | FPGS | GPR124 | HLA-DQA1 | IKZF1 | KANK3 | KRT4 |
| EHBP1 | ERCC4 | FANCA | FGFR4 | FRG1B | GPRIN2 | HLF | IL11 | KAT6A | KRTAP10-6 |
| EIF4A2 | ERCC5 | FANCC | FGR | FUT3 | GRIK2 | HMGXB4 | IL2 | KAT6B | KRTAP4-1 |
| ELF3 | ERCC6 | FANCD2 | FH | FYN | GRIN2A | HNF1A | IL21R | KCNB2 | KRTAP4-11 |
| KRTAP4-2 | LRRK2 | MAPK8IP1 | MLL4 | MYC | NEK11 | NTRK1 | PBRM1 | PIK3R1 | PREX2 |
| KRTAP4-3 | LTF | MARK1 | MLLT10 | MYCL1 | NF1 | NTRK2 | PBX1 | PIK3R2 | PRKAA1 |
| KRTAP4-7 | LTK | MARK4 | MLLT3 | MYCN | NF2 | NTRK3 | PCBP1 | PIM1 | PRKAA2 |
| KRTAP4-9 | LYN | MBD1 | MMP2 | MYD88 | NFE2L2 | NUDT10 | PCDH12 | PIP4K2A | PRKAB1 |
| KRTAP5-1 | M6PR | MCCC2 | MN1 | MYH11 | NFE2L3 | NUMA1 | PDE11A | PKD1L2 | PRKAB2 |
| KRTAP5-2 | MAD2L1 | MCHR2 | MPL | MYH9 | NFKB1 | NUP155 | PDE4D | PKHD1 | PRKAG1 |
| KRTAP5-5 | MAF | MCL1 | MRE11A | MYL1 | NFKB2 | NUP214 | PDE4DIP | PLAG1 | PRKAG2 |
| LAMP1 | MAFB | MCM2 | MS4A1 | MYOM1 | NFKBIA | NUP93 | PDE7A | PLCG1 | PRKAG3 |
| LCE1F | MAGEA1 | MDM2 | MSH2 | MYST4 | NFXL1 | NUP98 | PDGFB | PLEKHG5 | PRKAR1A |
| LCE4A | MAGEA3 | MDM4 | MSH3 | NALCN | NIN | OPRK1 | PDGFRA | PML | PRKCH |
| LCK | MAGI1 | MECOM | MSH4 | NAT2 | NIPBL | OR11H4 | PDGFRB | PMS1 | PRKDC |
| LGALS9B | MALAT1 | MED12 | MSH5 | NAV3 | NKX2-1 | OR2B11 | PDK1 | PMS2 | PRKRA |
| LHCGR | MALT1 | MED13 | MSH6 | NBEA | NLRP1 | OR4C5 | PER1 | POLE | PRPF19 |
| LIFR | MAML2 | MEF2B | MST1R | NBN | NME1 | OR52D1 | PGAP3 | POLI | PRX |
| LIG1 | MAP2K1 | MEN1 | MTHFR | NBPF10 | NOS3 | OR5K4 | PGF | POLQ | PSIP1 |
| LILRB3 | MAP2K2 | MET | MTOR | NCF4 | NOTCH1 | OR6C76 | PGR | POR | PSMB5 |
| LIMCH1 | MAP2K4 | MGMT | MTR | NCOA1 | NOTCH2 | OR8I2 | PHF6 | POT1 | PSMD2 |
| LIMK1 | MAP3K1 | MIR142 | MTRR | NCOA2 | NOTCH4 | ORAI1 | PHGR1 | POTEC | PTCH1 |
| LLPH | MAP3K7 | MITF | MUC1 | NCOA3 | NPM1 | PAK3 | PHOX2B | POU5F1 | PTCH2 |
| LMAN1 | MAP4K5 | MKL1 | MUC2 | NCOA4 | NQO1 | PALB2 | PIK3C2B | PPARD | PTDSS1 |
| LOR | MAPK1 | MLH1 | MUC4 | NCOA6 | NR1H2 | PARP1 | PIK3C3 | PPARG | PTDSS2 |
| LPHN3 | MAPK11 | MLH3 | MUC6 | NCOR1 | NRAS | PAX3 | PIK3CA | PPP2R1A | PTEN |
| LPP | MAPK14 | MLL | MUTYH | NCOR2 | NRP2 | PAX5 | PIK3CB | PPP6C | PTGIS |
| LRP1B | MAPK3 | MLL2 | MVK | NDRG1 | NRXN3 | PAX7 | PIK3CD | PRDM1 | PTGS2 |
| LRP2 | MAPK8 | MLL3 | MYB | NEFH | NSD1 | PAX8 | PIK3CG | PRDX4 | PTK6 |
| PTPN11 | RG9MTD1 | RPS12 | SEPT9 | SLC22A2 | SOD2 | STAT1 | TCERG1 | TMBIM4 | TRIM48 |
| PTPRD | RGPD3 | RPS6KA2 | SERPINA10 | SLC25A13 | SOX10 | STAT3 | TCF12 | TMEM106B | TRIP11 |
| PTPRT | RGS12 | RPS6KA6 | SETBP1 | SLC28A3 | SOX11 | STAT4 | TCF3 | TMEM22 | TRRAP |
| RAC1 | RHEB | RPS9 | SETD2 | SLC29A1 | SOX17 | STK11 | TCF7L1 | TMEM37 | TSC1 |
| RAC2 | RHOH | RPSAP58 | SETD4 | SLC2A5 | SOX2 | STK36 | TCF7L2 | TMEM60 | TSC2 |
| RAD21 | RHPN2 | RPTN | SF3B1 | SLC35F5 | SOX9 | STMN1 | TCL1A | TMEM97 | TSHR |
| RAD50 | RIC8A | RPTOR | SG223 | SLC36A2 | SP1 | SUFU | TEAD2 | TMPO | TSHZ2 |
| RAF1 | RICTOR | RRM1 | SGK1 | SLC3A2 | SPATA3 | SULT1A1 | TEK | TMPRSS2 | TSHZ3 |
| RALGDS | RIN3 | RRM2 | SgK223 | SLC45A3 | SPECC1L | SULT1C4 | TERT | TMSB4X | TTF1 |
| RALY | RLIM | RSBN1L | SH2D1A | SLC6A18 | SPEN | SULT2B1 | TET1 | TNFAIP3 | TTK |
| RARA | RNASEL | RUNX1 | SH3BGR | SLCO1B1 | SPG7 | SVIL | TET2 | TNFAIP6 | TTLL10 |
| RARB | RND3 | RUNX1T1 | SH3GL1 | SLIT1 | SPOP | SYK | TFAM | TNFRSF14 | TUBB3 |
| RARG | RNF145 | RYR1 | SHROOM4 | SLIT2 | SPRYD5 | SYNE1 | TFB2M | TNFRSF8 | TXNDC2 |
| RASA1 | RNF2 | SAMD9 | SI | SLK | SRBD1 | TACR1 | TFE3 | TNFSF11 | TYMS |
| RB1 | RNF213 | SBDS | SIK1 | SMAD2 | SRC | TAF1 | TGFB1 | TNFSF13B | U2AF1 |
| RBM27 | RNF43 | SCAI | SIK2 | SMAD4 | SRGAP3 | TAF1B | TGFB2 | TNK2 | UBA7 |
| RBM5 | ROCK1 | SCYL2 | SIN3A | SMARCA4 | SRMS | TAF1L | TGFBR2 | TOMM70A | UBE3C |
| RBMX | ROS1 | SDHA | SLAMF1 | SMARCB1 | SRPK2 | TAL1 | TGM7 | TOP1 | UBE4A |
| RECQL4 | RP11-231C14.2 | SDHB | SLAMF7 | SMC1A | SRPR | TBC1D23 | THAP2 | TOP2A | UBR5 |
| REL | RP11-671M22.1 | SDHC | SLC10A2 | SMC3 | SRSF2 | TBK1 | THAP3 | TP53 | UGT1A1 |
| RELN | RP1L1 | SDHD | SLC11A2 | SMO | SSX1 | TBL1XR1 | THAP5 | TP63 | UGT1A4 |
| RET | RPL22 | SEC31A | SLC19A1 | SMTNL2 | ST18 | TBP | THBS1 | TPMT | UGT1A6 |
| RETNLB | RPL5 | SELPLG | SLC22A1 | SMUG1 | ST3GAL5 | TBX22 | TIMP3 | TPR | UGT1A9 |
| RFC1 | RPL8 | SEMA5B | SLC22A12 | SNX13 | ST8SIA1 | TBX3 | TLR4 | TRIM24 | UGT2B15 |
| RFX3 | RPN1 | SEPP1 | SLC22A16 | SOCS1 | STAG2 | TBXAS1 | TLX1 | TRIM33 | UGT2B7 |
| UHRF1 | XBP1 | ZNF776 | USP35 | XRCC1 | VEGFA | XYLT2 | VEZT | ZFR2 | WASH3P |
| ULK4 | XPA | ZNF814 | USP36 | XRCC2 | VEGFB | YAP1 | VHL | ZNF217 | WDR37 |
| UPB1 | XPC | ZNF844 | USP9X | XRCC3 | VEGFC | YES1 | VIT | ZNF365 | WDR66 |
| UPF3A | XPO1 | ZNF429 | VCX2 | XRCC4 | VEZF1 | ZFP37 | WAS | ZNF384 | WDTC1 |
| WHSC1 | ZNF516 |  |  |  |  |  |  |  |  |
| WISP3 | ZNF521 |  |  |  |  |  |  |  |  |
| WNT3A | ZNF527 |  |  |  |  |  |  |  |  |
| WRN | ZNF605 |  |  |  |  |  |  |  |  |
| WT1 | ZNF703 |  |  |  |  |  |  |  |  |
| ZNF462 | ZNF717 |  |  |  |  |  |  |  |  |
| ZNF479 |  |  |  |  |  |  |  |  |  |

**Supplementary figures**

**Figure S1** OS by PD‑L1 expression ≥90%.X-axis is in years. The analyses are censored at 5 years. OS, overall survival; PD-L1, programmed cell death ligand-1.


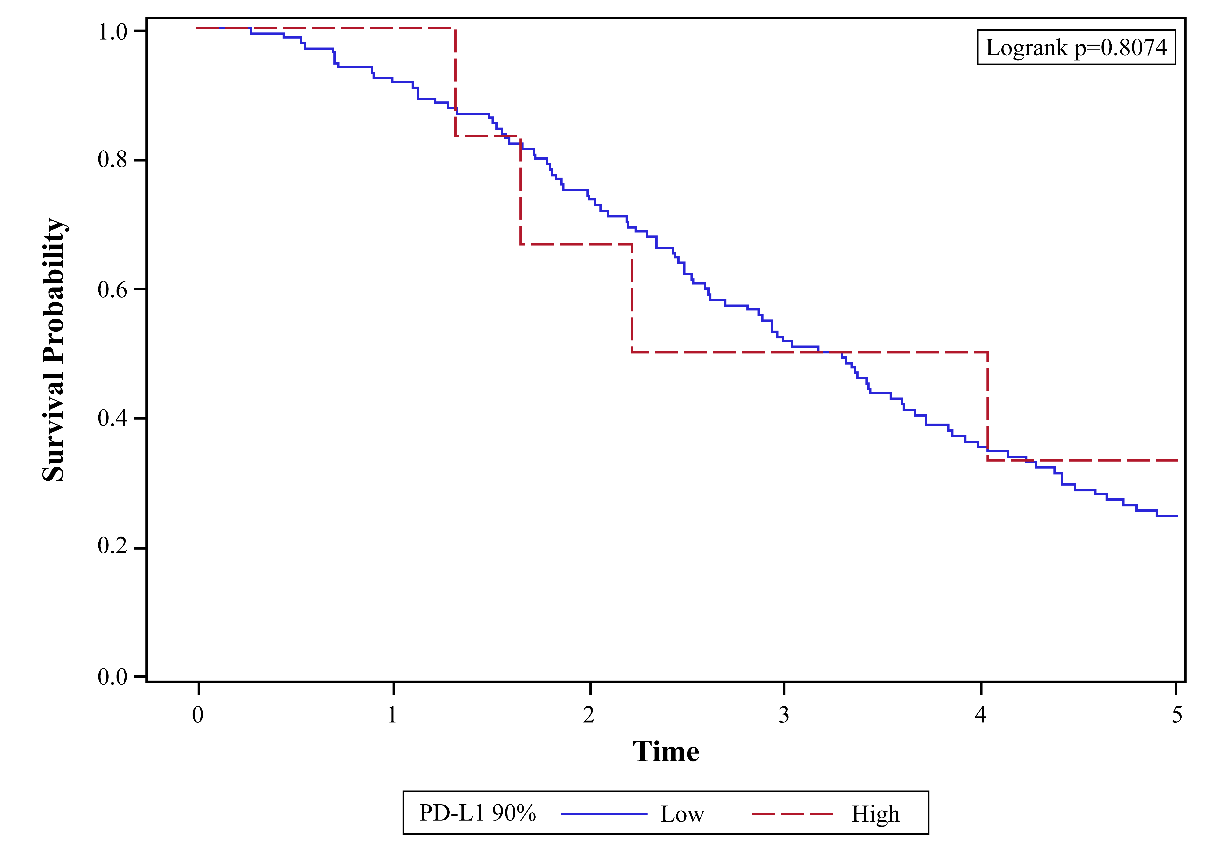


**Figure S2** PFS by PD‑L1 expression ≥90%.X-axis is in years. The analyses are censored at 5 years. PD-L1, programmed cell death ligand-1; PFS, progression-free survival.


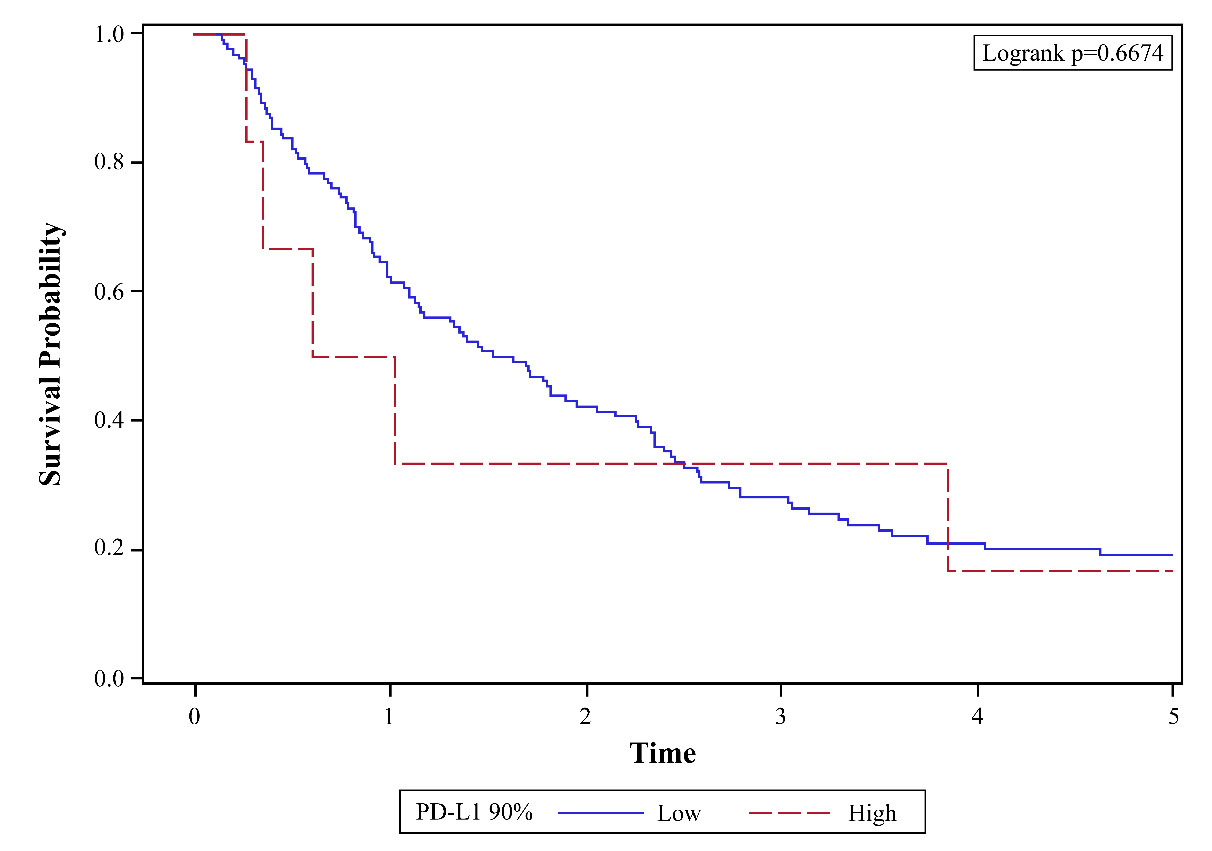


**Figure S3** OS from initiation of second-line therapy by PD‑L1 expression ≥90%.X-axis is in years. The analyses are censored at 5 years. OS, overall survival; PD-L1, programmed cell death ligand-1.


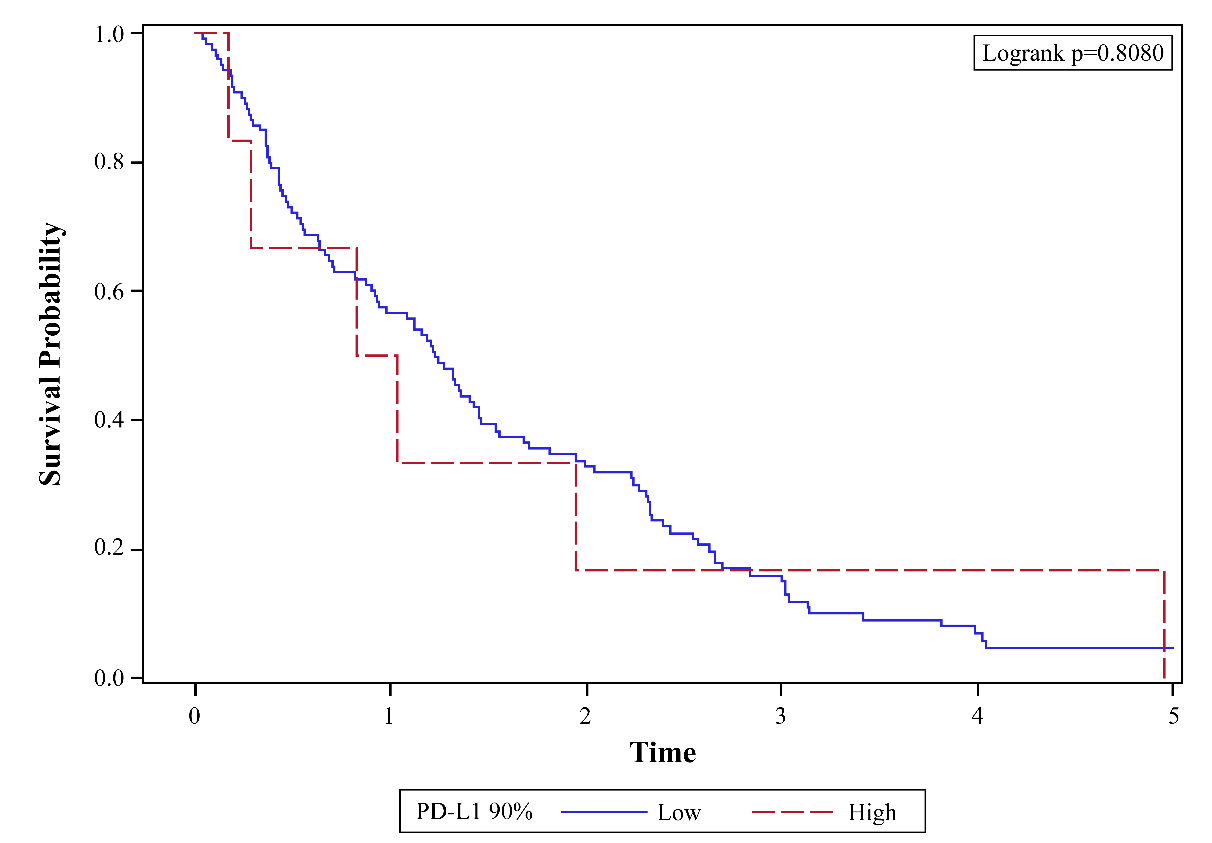


**Figure S4** OS from initiation of third-line therapy by PD‑L1 expression ≥90%.X-axis is in years. The analyses are censored at 5 years. OS, overall survival; PD-L1, programmed cell death ligand-1.


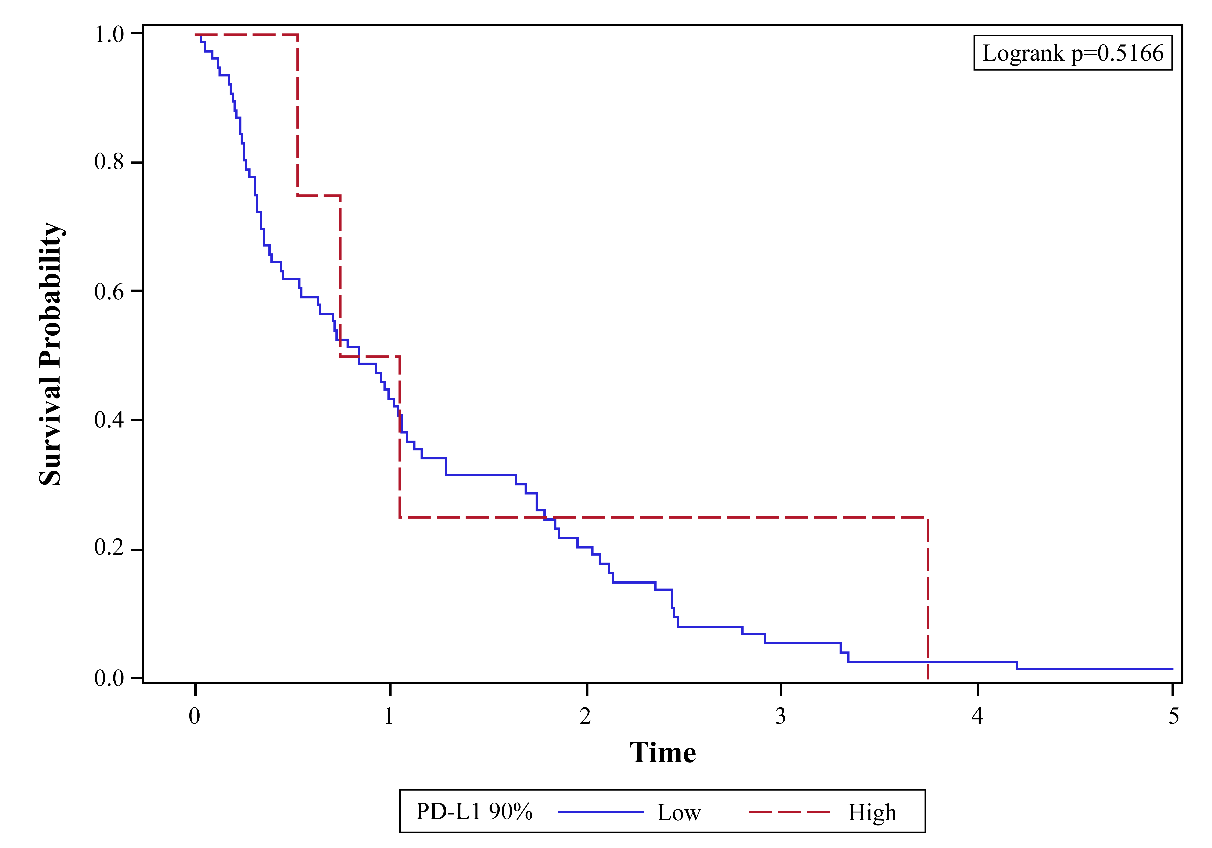


**Figure S5** OS by PD‑L1 expression and *EGFR* mutation status.X-axis is in years. The analyses are censored at 5 years. *EGFR*, epidermal growth factor receptor; OS, overall survival; PD-L1, programmed cell death ligand-1.


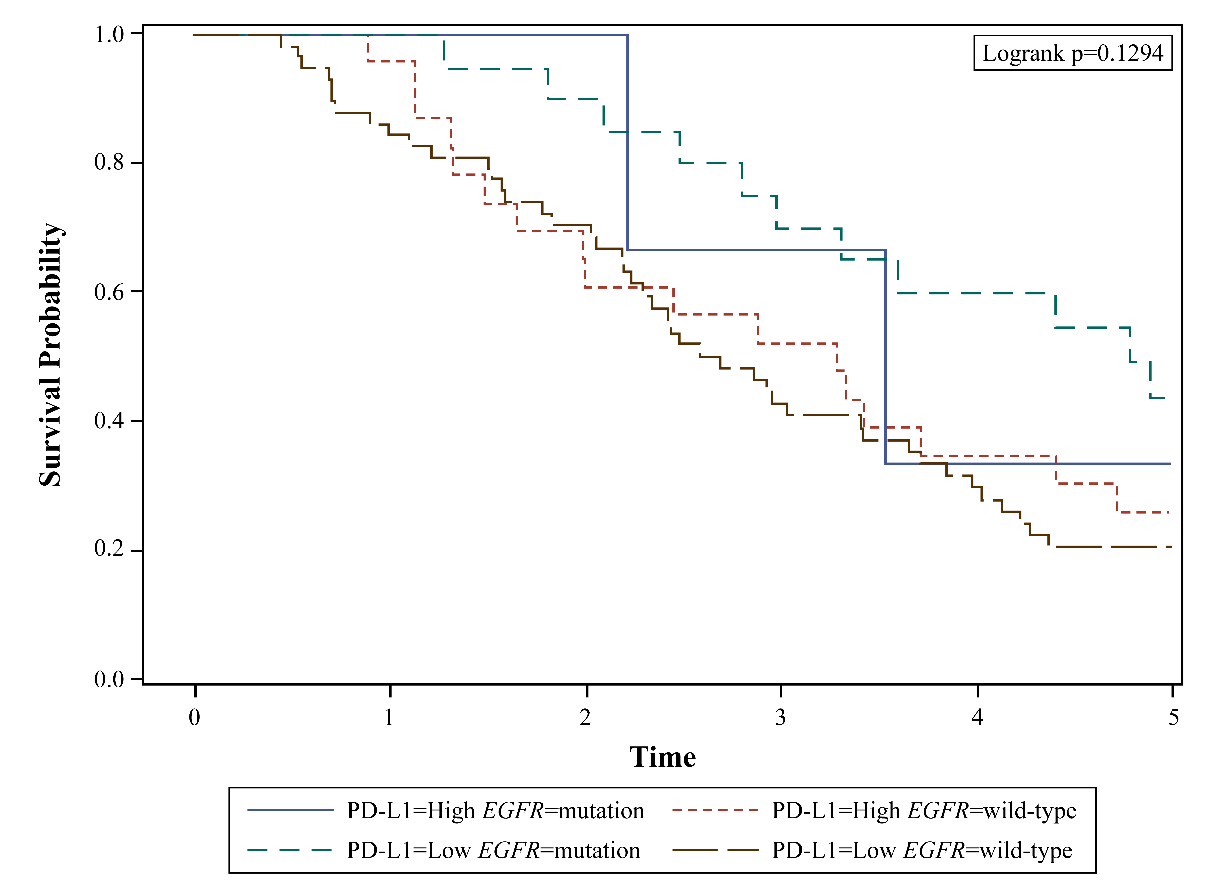


**Figure S6** PFS by PD‑L1 expression and *EGFR* mutation status. X-axis is in years. The analyses are censored at 5 years. *EGFR*, epidermal growth factor receptor; PD-L1, programmed cell death ligand-1; PFS, progression-free survival.


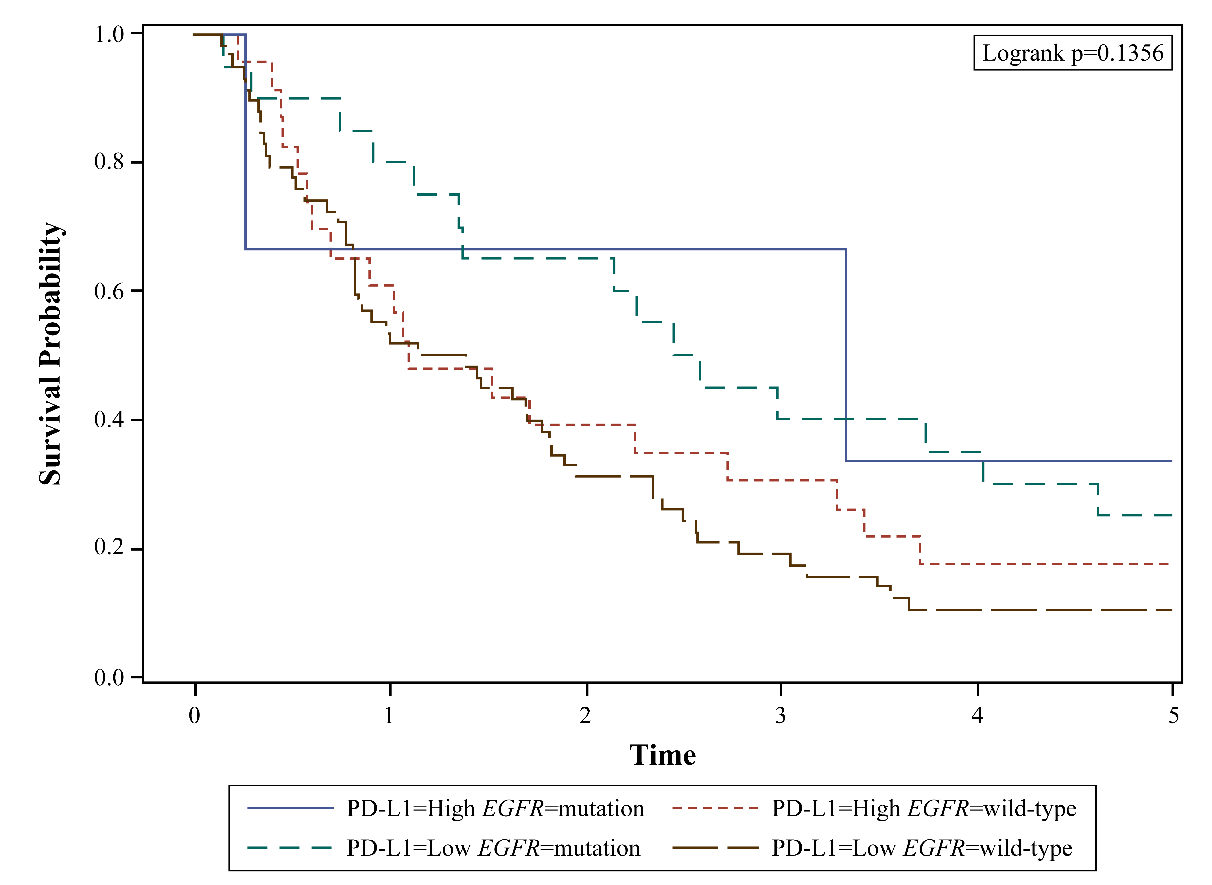


**Figure S7** OS by PD‑L1 expression and *KRAS* mutation status. X-axis is in years. The analyses are censored at 5 years. *KRAS*, Kirsten rat sarcoma viral oncogene; OS, overall survival; PD-L1, programmed cell death ligand-1.


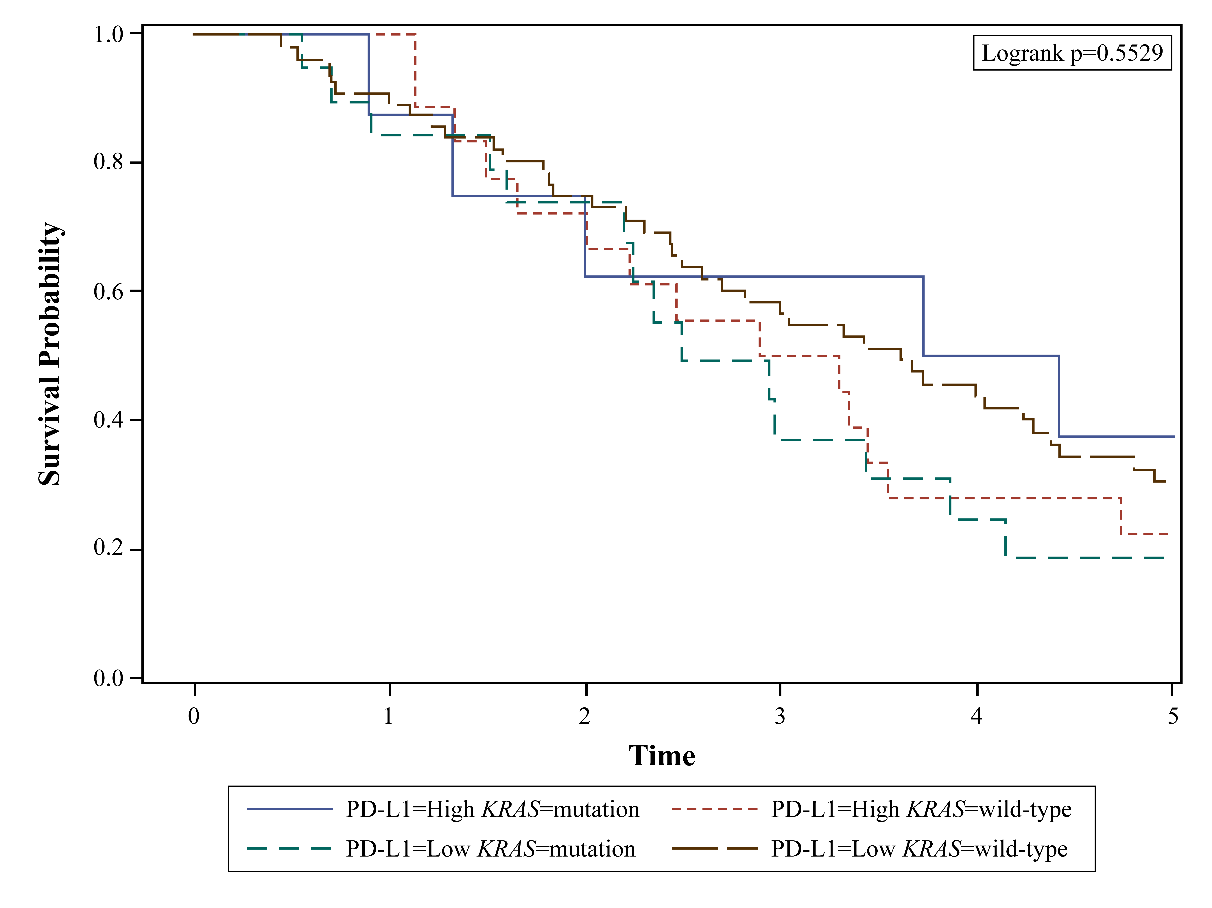


**Figure S8** PFS by PD‑L1 expression and *KRAS* mutation status.X-axis is in years. The analyses are censored at 5 years. *KRAS*, Kirsten rat sarcoma viral oncogene; PD-L1, programmed cell death ligand-1; PFS, progression-free survival.


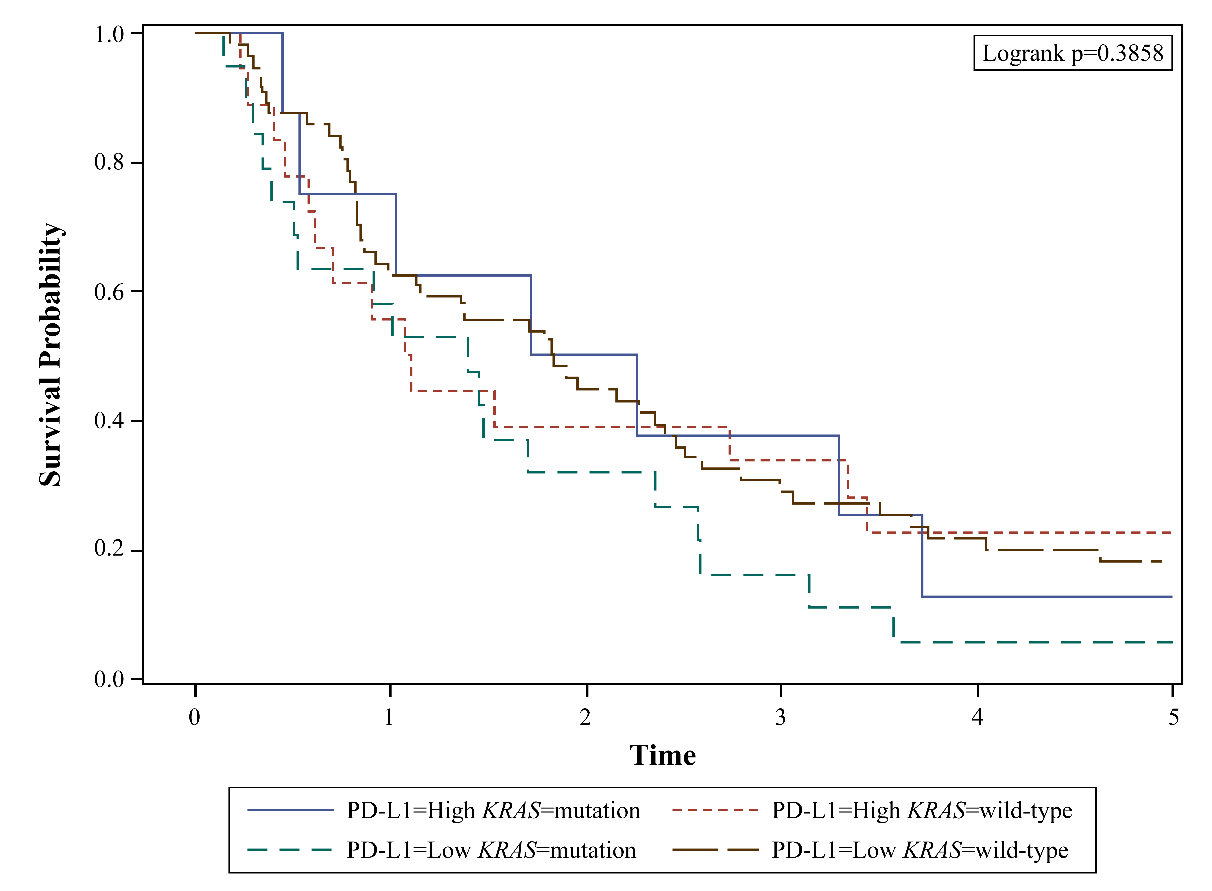

Supplement: Supplementary file 1 [file get_supplementary_file.php]
